# Supplementary material for: Gender Differences in Student Participation in an Active-Learning Classroom
Source: Atypon-hosted journal article supplement (doi:10.1187/cbe.19-03-0048), 2020-05-26
Supplement: combinedsupmats.pdf [file combinedsupmats.pdf]

# Supplemental Material

*CBE—Life Sciences Education*

*Aguillon et al.*

**TABLE S1.** Summary table characterizing the classroom observations dataset.

| Instructor               | Number of lectures observed | Mean number of interactions per lecture | Standard deviation |
|--------------------------|-----------------------------|-----------------------------------------|--------------------|
| <i>2016 Observations</i> |                             |                                         |                    |
| Instructor A             | 6                           | 10.8                                    | 4.36               |
| Instructor B             | 5                           | 10.0                                    | 3.16               |
| Instructor C             | 4                           | 15.8                                    | 8.66               |
| Instructor D             | 3                           | 9.0                                     | 7.21               |
| <i>2017 Observations</i> |                             |                                         |                    |
| Instructor B             | 4                           | 10.0                                    | 2.83               |
| Instructor C             | 5                           | 20.6                                    | 6.15               |
| Instructor E             | 2                           | 9.5                                     | 0.71               |
| Instructor F             | 5                           | 8.2                                     | 1.92               |
| Instructor G             | 4                           | 5.5                                     | 3.11               |
| Instructor H             | 2                           | 2.5                                     | 0.71               |
